# Supplementary material for: Identification of Aspergillus niger Aquaporins Involved in Hydrogen Peroxide Signaling
Source: MDPI journal article supplement (doi:10.3390/jof9040499), 2023-04-21
Supplement: s1 [file s1]

## Identification of *Aspergillus niger* aquaporins involved in hydrogen peroxide signaling

Thanaporn Laothanachareon <sup>1,2,\*</sup>, Enrique Asin-Garcia <sup>1,3</sup>, Rita J.M. Volkers <sup>1</sup>, Juan Antonio Tamayo-Ramos <sup>4</sup>, Vitor A.P. Martins dos Santos <sup>3</sup> and Peter J. Schaap <sup>1,5,\*</sup>

<sup>1</sup> Laboratory of Systems and Synthetic Biology, Wageningen University & Research, 6708 WE Wageningen, The Netherlands; enrique.asingarcia@wur.nl (E.A.-G.); j.m.volkers@nvwa.nl (R.J.V.)

<sup>2</sup> Enzyme Technology Laboratory, Biorefinery and Bioproduct Technology Research Group, National Center for Genetic Engineering and Biotechnology, 113 Thailand Science Park, Khlong Luang, Pathumthani 12120, Thailand

<sup>3</sup> Biomanufacturing and Digital Twins, Wageningen University and Research, 6708 PB Wageningen, The Netherlands; vitor.martinsdossantos@wur.nl

<sup>4</sup> ITENE Research Center, Industrial Biotechnology Area, C/Albert Einstein 1, Paterna, 46980 Valencia, Spain; ja.tamayoramos@gmail.com

<sup>5</sup> UNLOCK Large Scale Infrastructure for Microbial Communities, Wageningen University and & Research and Delft University of Technology, 6708 WE Wageningen, The Netherlands

\* Correspondence: thanaporn.lao@biotec.or.th (T.L.); peter.schaap@wur.nl (P.J.S.)

**Table S1: Primers used in this study****A: Primers for yeast experiment**

| Primer       | Sequence 5' → 3'                                                         |
|--------------|--------------------------------------------------------------------------|
| SC_aqpA.1_FW | GCATCGTCTCATCGGTCTCATATG <u>GGG</u> CCGCAACAATGGTTTC                     |
| SC_aqpA.1_RV | ATGCCGTCTCCGTGACCCGGGCGCTGGCTTGG                                         |
| SC_aqpA.2_FW | GCATCGTCTCATCACCTCCAAACACCTCAAACCTG                                      |
| SC_aqpA.2_RV | ATGCCGTCTCAGGTCTCAGGATCCCACCTGCTCTGCCCCGTG                               |
| SC_aqpB.1_FW | GCATCGTCTCATCGGTCTCATATG <u>GT</u> GCACCCGGTTAGATCTCTC                   |
| SC_aqpB.1_RV | ATGCCGTCTCCGGCGCCCCTCCTGGAGGTTTCTTC                                      |
| SC_aqpB.2_FW | GCATCGTCTCACGCCTCTCGCAACAAAAGTCATGGAAC                                   |
| SC_aqpB.2_RV | ATGCCGTCTCCTCCCTTTCTTCCTTTTCGATCCTCCGGCAAGGCTCCATA<br>CCGCATTCCGTCCCGGAC |
| SC_aqpB.3_FW | GCATCGTCTCAGGGACGAGGATGGACGAGAACGCC                                      |
| SC_aqpB.3_RV | ATGCCGTCTCCGGCCGAGAGTGATGGCGATGG                                         |
| SC_aqpB.4_FW | GCATCGTCTCAGGCCTCTGCGGCGGGTTGTCAACC                                      |
| SC_aqpB.4_RV | ATGCCGTCTCCTTTCGACGGAGAGGTTGACGATG                                       |
| SC_aqpB.5_FW | GCATCGTCTCAGAAACCAACCTCCCACAAAGCGAAAC                                    |
| SC_aqpB.5_RV | ATGCCGTCTCCCTCCTCGGCGGGTAATTGATCG                                        |
| SC_aqpB.6_FW | GCATCGTCTCAGAGGCGCAAGCGCGCACTGCTGATC                                     |
| SC_aqpB.6_RV | ATGCCGTCTCCGGTCTCAGGATCCATCCTGGTTCTCCTCAACTG                             |
| SC_aqpC_FW   | GCATCGTCTCATCGGTCTCATATGCGAGGCCTACTGTTTCGTC                              |
| SC_aqpC_RV   | ATGCCGTCTCAGGTCTCAGGATCCTGCCTTCCATGGCGGCAC                               |
| SC_aqpD.1_FW | GCATCGTCTCATCGGTCTCATATGTTTCTCAACACTGGCCTCTC                             |
| SC_aqpD.1_RV | ATGCCGTCTCCTCCCCCTCATAGAGGAATGTGTCTG                                     |
| SC_aqpD.2_FW | GCATCGTCTCAGGGACGGGTCGCGCATCACCGATG                                      |
| SC_aqpD.2_RV | ATGCCGTCTCAGGTCTCAGGATCCGTGCAGCCGCAGAGCAC                                |
| SC_aqpE.1_FW | GCATCGTCTCATCGGTCTCATATGACGACGGGGAAACCAGG                                |
| SC_aqpE.1_RV | ATGCCGTCTCCAACGCGGCGGGTGGGAGAAAC                                         |

| Primer            | Sequence 5' → 3'                                                                                                                                                                                                                                                                                                                                                                                                                                 |
|-------------------|--------------------------------------------------------------------------------------------------------------------------------------------------------------------------------------------------------------------------------------------------------------------------------------------------------------------------------------------------------------------------------------------------------------------------------------------------|
| SC_aqpE.2_FW      | GCAT <b>CGTCTC</b> <u>ACGTTT</u> CTGGCCGTGATGGCTCCG                                                                                                                                                                                                                                                                                                                                                                                              |
| SC_aqpE.2_RV      | ATGCC <b>GTCTC</b> <u>CTGTCT</u> CTTCTGGGCCAGCCATGGTG                                                                                                                                                                                                                                                                                                                                                                                            |
| SC_aqpE.3_FW      | GCAT <b>CGTCTC</b> <u>CAGACA</u> CCTCAGCTGCGCTTGGC                                                                                                                                                                                                                                                                                                                                                                                               |
| SC_aqpE.3_RV      | ATGCC <b>GTCTC</b> <u>CTTTT</u> CACTGGGAGCCGGGGTTTCGCC                                                                                                                                                                                                                                                                                                                                                                                           |
| SC_aqpE.4_FW      | GCAT <b>CGTCTC</b> <u>CAGAA</u> ACCCATGAGGAACCCCTCAG                                                                                                                                                                                                                                                                                                                                                                                             |
| SC_aqpE.4_RV      | ATGCC <b>GTCTC</b> <u>CAACG</u> TAGATGGCCATCATGGTAGC                                                                                                                                                                                                                                                                                                                                                                                             |
| SC_aqpE.5_G-Block | GCAT <b>CGTCTC</b> <u>ACGTTT</u> CCGGTGGTGTGTCCGGTGCACATCTCAATCCG<br>ACCATCACCATTATGCTATGGTTTTACCGCGGTTTCCCCAAGAGCAAGA<br>TGCCCGAGTACTTCGCCGCGCAATTCTTGGGGGCCTTCATCGCCGCGCT<br>CGCCGCGTACGGTCTTTACTATCACTCCATCCAACACTATCTCCTGACC<br>AACTCCACCACGGGCATCATCACCAGCTTTGTGACAAGTCAGCGCGAA<br>ACCTGGATCGGTCCTGGTACTGCCTTCTTTACCGAATTTCTGGGCACGA<br>TGATACTGACGGTGGTGGTCCTGGCGCTGGGTGACGATCAGAACGCAC<br>CCCCGGGAGCGGGTATGAACTCACTCATCGTGGGGCGGAGACGGCAT |
| SC_aqpE.6_FW      | GCAT <b>CGTCTC</b> <u>CAGGG</u> CTCATGGTGACCTGCAACACG                                                                                                                                                                                                                                                                                                                                                                                            |
| SC_aqpE.6_RV      | ATGCC <b>GTCTC</b> <u>CAGGTCTC</u> <u>AGGAT</u> CCACGAACAGTCTTCTCTCCC                                                                                                                                                                                                                                                                                                                                                                            |
| SC_aqpF_FW        | GCAT <b>CGTCTC</b> <u>CATCGGTCTC</u> <u>ATATG</u> GTGGTCACTTATCTCCCCG                                                                                                                                                                                                                                                                                                                                                                            |
| SC_aqpF_RV        | ATGCC <b>GTCTC</b> <u>CAGGTCTC</u> <u>AGGAT</u> CCCTCCGCGCGAGGATCCTTC                                                                                                                                                                                                                                                                                                                                                                            |
| SC_aqpG.1_FW      | GCAT <b>CGTCTC</b> <u>CATCGGTCTC</u> <u>ATATG</u> ATACCTGAGACAGAGAAGAGT                                                                                                                                                                                                                                                                                                                                                                          |
| SC_aqpG.1_RV      | ATGCC <b>GTCTC</b> <u>CCCATCT</u> CGATCTTTGGAGGTGGGTGC                                                                                                                                                                                                                                                                                                                                                                                           |
| SC_aqpG.2_FW      | GCAT <b>CGTCTC</b> <u>CAGATG</u> ACCCCGGTAACCTTTCCTAC                                                                                                                                                                                                                                                                                                                                                                                            |
| SC_aqpG.2_RV      | ATGCC <b>GTCTC</b> <u>CAGGTCTC</u> <u>AGGAT</u> CCACTCAACGAAGCTGCCCC                                                                                                                                                                                                                                                                                                                                                                             |
| SC_FPS1_FW        | GCAT <b>CGTCTC</b> <u>CATCGGTCTC</u> <u>ATATG</u> AGTAATCCTCAAAAAGCTCTAAAC                                                                                                                                                                                                                                                                                                                                                                       |
| SC_FPS1_RV        | ATGCC <b>GTCTC</b> <u>CAGGTCTC</u> <u>AGGAT</u> CCTGTTACCTTCTTAGCATTACC                                                                                                                                                                                                                                                                                                                                                                          |
| SC_pYTK001_FW     | GCCTATGGAAAAACGCCAGC                                                                                                                                                                                                                                                                                                                                                                                                                             |
| SC_pYTK001_RV     | CGCTTGGA <del>CT</del> CCTGTTGATAG                                                                                                                                                                                                                                                                                                                                                                                                               |

Remark:

1. SC: primers for *Saccharomyces cerevisiae* experiment
2. underline letter: type specific overhangs
3. bold letter: restriction site for *BsaI* (GGTCTC) and *BsmBI* (CGTCTC)

## B: Primers for RT-qPCR

| Primer          | Sequence 5' → 3'         |
|-----------------|--------------------------|
| AN_qPCR_hist_FW | ACAATGACTGGCCGTGGAAAGG   |
| AN_qPCR_hist_RV | ATACGCTTGACACCACCACGAC   |
| AN_qPCR_aqpA_FW | CGCTATGCTTTGGGTCTCTG     |
| AN_qPCR_aqpA_RV | CCAGACACAGGGCCAGAGTGACCG |
| AN_qPCR_aqpB_FW | CCACGGATATTCCGAAGACGGATG |
| AN_qPCR_aqpB_RV | AGAGTGATGGCGATGGTTGTCC   |
| AN_qPCR_aqpC_FW | CGGTGGTGGGAATGCGTTGGAACC |
| AN_qPCR_aqpC_RV | GGAGAGGGGGGAGCCACATTCG   |
| AN_qPCR_aqpD_FW | ACTCCCGGACAATGGCGTAAAC   |
| AN_qPCR_aqpD_RV | ATGGCAGCACCAACAAATCCAC   |
| AN_qPCR_aqpE_FW | TGGTGAATCGCCGGTCAACTAC   |
| AN_qPCR_aqpE_RV | TCATCCGACTCTTTCGCATCGC   |
| AN_qPCR_aqpF_FW | TGACAGGACGGACCCTAAGAAC   |
| AN_qPCR_aqpF_RV | GCTATGCATTCTAGCACTGCGAAC |
| AN_qPCR_aqpG_FW | ATCCCGGTGCAAGATCTAATG    |
| AN_qPCR_aqpG_RV | CGAGACTACCATCCTCATCAAAG  |
| AN_qPCR_goxC_FW | AATGCTGCCCCGTGTGTATGGTG  |
| AN_qPCR_goxC_RV | TGGGACGACATTTGCGTAGGAG   |
| AN_qPCR_catR_FW | GCTGAAGTTGAACAGGCTGGTTTC |
| AN_qPCR_catR_RV | TCGGTGAAGTCAATGCCAGGAAC  |
| AN_qPCR_lctA_FW | CGGAAATTGCCATCTCACC      |
| AN_qPCR_lctA_RV | GGCGATGGAATCGTTGTTG      |

Remark:

AN: primer for *A. niger* experiments

### C: Primers for *A. niger* experiment

| Primer           | Sequence 5' → 3'                                       |
|------------------|--------------------------------------------------------|
| AN_aqpD_FW       | ATGTTTCTCAACACTGGCCTCTCG                               |
| AN_aqpD_RV       | TTAGTGCAGCCGCAGAGCACCG                                 |
| AN_aqpD_KO_p1    | GGAGTCCCTCTACCTTTCCAGG                                 |
| AN_aqpD_KO_p2    | <u>CAATTCCAGCAGCGGCTTGGGA</u> AAGATTCGTAGGGGTACCG      |
| AN_aqpD_KO_p3    | <u>ACACGGCACAATTATCCATCGCGATACTGGCTGGAATAGAG</u><br>G  |
| AN_aqpD_KO_p4    | CGCCAAGAACAGTGTGTCC                                    |
| AN_aqpD_KO_p11   | GGTGCCGAGTCCGTTCCGCC                                   |
| AN_aqpD_KO_p12   | CCAACCTTACCAAAGAATTCC                                  |
| AN_aqpE_FW       | ATGGACGACGGGGAGACCAGG                                  |
| AN_aqpE_RV       | TCAACGAACAGTCTTCTCTCCC                                 |
| AN_aqpE_KO_p1    | GGAGCAAGAATCAAGGAACG                                   |
| AN_aqpE_KO_p2    | <u>CAATTCCAGCAGCGGCTTGGGCGAAGGGTGATAAAATTGCT</u><br>CC |
| AN_aqpE_KO_p3    | <u>ACACGGCACAATTATCCATCGCCAGATTGTTTGAGAATGCC</u>       |
| AN_aqpE_KO_p4    | GCGGCAAAGTTAGGCGACTCC                                  |
| AN_aqpE_KO_p11   | CCTCGGAAGACACAATGGATCG                                 |
| AN_aqpE_KO_p12   | CGAATGCGAGCAGCGAAACAGGG                                |
| AN_aqpF_FW       | ATGGTGGTCACTTATCTCCCCG                                 |
| AN_aqpF_RV       | TTACTCCGCGCGAGGATCCTTCC                                |
| AN_aqpF_KO_p1    | CGCTAAGATCGCTGGCACGCG                                  |
| AN_aqpF_KO_p2    | <u>CAATTCCAGCAGCGGCTTGGGGCTGCTATCAAGATAAG</u><br>TG    |
| AN_aqpF_KO_p3    | <u>ACACGGCACAATTATCCATCGCATGGGAACGGAGTGTC</u><br>GG    |
| AN_aqpF_KO_p4    | GGCTGCAGATAAGCTGGACG                                   |
| AN_aqpF_KO_p11   | CCGAAAGTATTTACAGTTGAC                                  |
| AN_aqpF_KO_p12   | GCGCTCTGATGTCTGGTCGG                                   |
| AN_AOpyrG12FW_p5 | AAGCCGCTGCTGGAATTG                                     |
| AN_AOpyrG13RV_p6 | CGATGGATAATTGTGCCGTGT                                  |

| Primer             | Sequence 5' → 3'     |
|--------------------|----------------------|
| AN_AOpyrG14FW_p7   | ATTGACCTACAGCGCACGC  |
| AN_AOpyrG15RV_p8   | CCGGTAGCCAAAGATCCCTT |
| AN_AOpyrGintFW_p14 | GGCAATTGTCGTGCAGTTTG |
| AN_AOpyrGintRV_p13 | AATTCCACGGCCAGCAATAA |

Remark:

underline letter: overlapped sequences of *pyrG* gene
