# Supplementary material for: Identification of Aspergillus niger Aquaporins Involved in Hydrogen Peroxide Signaling
Source: MDPI journal article supplement (doi:10.3390/jof9040499), 2023-04-21
Supplement: s1 [file s1]

## Identification of *Aspergillus niger* aquaporins involved in hydrogen peroxide signaling

Thanaporn Laothanachareon <sup>1,2,\*</sup>, Enrique Asin-Garcia <sup>1,3</sup>, Rita J.M. Volkers <sup>1</sup>, Juan Antonio Tamayo-Ramos <sup>4</sup>, Vitor A.P. Martins dos Santos <sup>3</sup> and Peter J. Schaap <sup>1,5,\*</sup>

<sup>1</sup> Laboratory of Systems and Synthetic Biology, Wageningen University & Research, 6708 WE Wageningen, The Netherlands; enrique.asingarcia@wur.nl (E.A.-G.); j.m.volkers@nvwa.nl (R.J.V.)

<sup>2</sup> Enzyme Technology Laboratory, Biorefinery and Bioproduct Technology Research Group, National Center for Genetic Engineering and Biotechnology, 113 Thailand Science Park, Khlong Luang, Pathumthani 12120, Thailand

<sup>3</sup> Biomanufacturing and Digital Twins, Wageningen University and Research, 6708 PB Wageningen, The Netherlands; vitor.martinsdossantos@wur.nl

<sup>4</sup> ITENE Research Center, Industrial Biotechnology Area, C/Albert Einstein 1, Paterna, 46980 Valencia, Spain; ja.tamayoramos@gmail.com

<sup>5</sup> UNLOCK Large Scale Infrastructure for Microbial Communities, Wageningen University and & Research and Delft University of Technology, 6708 WE Wageningen, The Netherlands

\* Correspondence: thanaporn.lao@biotec.or.th (T.L.); peter.schaap@wur.nl (P.J.S.)

### Dataset S1: *A. niger* AQPs sequences and domain identification

- **AQP Conserved structural features.** Loop B and E contain conserved motifs important for AQP classification. Picture adapted from Kruse et al., 2006.

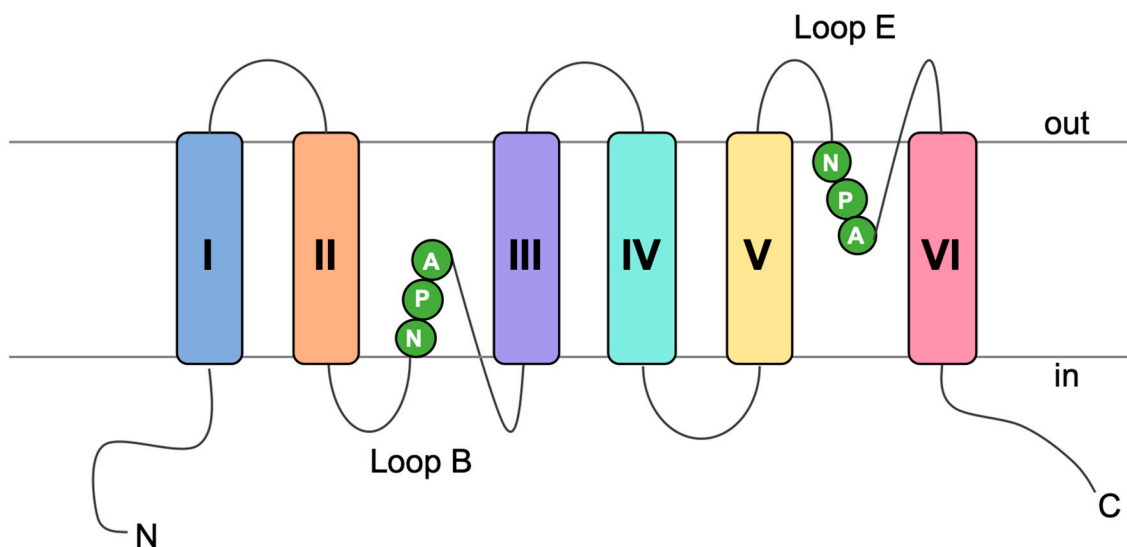

- **AQP amino acid sequence annotation**

- Transmembrane domains I to VI are coloured as indicated above.
- Cysteine residues are indicated in bold.
- NPA motifs in loop B and E are indicated in green and bold.
- Conserved sequences in loop B and E are underlined.

>**AQPA**\_ATCC64974\_2160 (5 transmembrane domains)

MGPQQWFRKRNPDSQTAPMYRSSNNQLPMLHLADTTRNN**FIAAVGEFVGTFLEFLFFSFA**GTQVSNTPKPAPGSP  
NTSNLLYSSL**CF**GFSLMVNVWAFYR**VTGGLFNP**AVTLAL**CLVGG**LSPIRG**VILFGVQLIAGIASAGVVGAL**FP  
LNVGTRLGGGASISQ**GLFIEVFLTAQLVFIIIMLAV**VKHKST**FLAPVGIGLVFFVTEMVG**DYYT**GGS**L**NP**ARSLG  
PDVINRSFPGYHWIY**WVGPLLGSLLACGFFTF**LKMFQYTTVNPQGQDYNE

>**AQPB**\_ATCC64974\_25380

MVHPVRSNLKELDQVDTESRGYRSSDTTEGGSSKVEDGDEPIEETSRRGVSRNKSHTGTQRTNFSRNKSHASHRTG  
VSQNQSYRSQPPATLRNQSYGSQAQFSLAGPNAYYGLPQQGAYMHPEYQSFNPQYGNMQGDKPVWSLAQPLPHV  
VRDGMRYGALPEDRKEERDEDEGRERPPPASEEPPTDIPKTDEARENGEEPQNEMGFFNKWSKIRYYLREP**LGEWL**  
**GTTIAITLGLCGGL**STYTSQGAGSWMTQSA**CWGF****SFMIGIYIVGGISGGHLNP**AITISMSLWRGFPARR**CVIYI**  
**LAQLIGAITAGGFAYAI**YHDAIVNLSVETNLPQSETTASQAFLTLPKQFVSP**ATAFFNEFLGTAILVGTIMALGD**  
DTNAPPGAGMQ**AFIIGILITVLVLALGYNTGGA**FNPRDFGPRLVAVMAGWGHLFKEYHAWWIWGP**WVADIFGG**  
**LFGAFIYDLVVFTGG**ESPINYPPIRRKRALLIKEKNLRSKLRFGRRKIGDIERAVEENQD

>**AQPC**\_ATCC64974\_26080 (5 transmembrane domains)

MAGLLFRPQNDIDPSVNVQQLS**CK**PHVQPFVGRIGGNQGVLDLRADPDNAEYLRKVPDAAPLMSARDAFNVRGFT  
DLDLWR**FAVVE****CVGTMMLAFITAWAA**ATPAN**V**APPSPSTPAGIFATTAFLGP**LVGAVTNWLLLTLFIFSFSS**VSG  
SHL**NP**TITLATFFARLISLPR**MLVLYLCGQILGGALAGWML**QSAFGSGQYSVGG**CV**VDLTALVPVREA**FVLEFICSL**  
**TLIFLSFGVGLD**PRQVR**VYGAALSPWL**VGMVL**GAVSLGSA**YTREGYGGAC**VL**FFYTTLTSK**CS**V**PSE****C**PEANFRFQ  
R

>**AQPD**\_ATCC64974\_52260

MFLNTGLSRKFLKPYVAE**FLGTALLIVIGDGVVAQCL**LSDYQYGTW**LSINIAWAAAVCISGYLS**DPGPTIN**PAVT**  
**I****CMALVRPTPGQWRKLP**GP**KLFAQFLGGFVGAAIVYIN**YRSAIKDWDPEFTIPGGSILSPRGHHSAGIFSTYPAAF  
**FESNWEAAFSSELLGSAVLMFGILSIS**DPVNAVRFHSPQV**TVFFLLTAIGAALGWQTGYAIN**PARDFGPRLFSAFI  
YGREVFATAANY**YFVVP**IFAPIVG**CVVGAATY**DTFLYEGDGSRTDALDNVEDRDGALRLH

>**AQPE**\_ATCC64974\_71680

MDDGETRRPRATSDAISPRGENPPTSPLSPTRGRRGTAGDADFVSPTRRVSGRDGSGAGVRRRSSAASRRSGGSG  
IPSLAPRTTLAGRTQGRFTMAGPEETPQLRLAHEFPVQPGYGD**LNPS**YEQPANSPVWGLAKPLPRVVRPGMVPT  
KEELLEARNQNIQLPAENSQKLGLEVPNDLELGQIEKTADPRKMAAQVEDARIQRENNFMNKILSGDATTTTRQGS  
RLSRTSSSRIRRPASAWDLPPENLSTVPEGETPAPSETHEEPPQMSSEEPLEPVLEEPELRADDGKDGMMDDLPLN  
EEIEAAYPEDLHPLVQELVEEEVHNHTTWSVIRTHHREALAES**LGVFVQLFVGFCGDLAVTV**ANAGNPNTTDWV  
WGFAT**MAIYVSGGVSGAHLNP**TITIM**W**YRGFPKSKMPEY**FAAQFLGAFIAALAAAYGLY**YHSIQHYLLTNSTT  
GIITSFVTSQRETWIGP**GTAFFTEFLGTMILTVVVLALG**DDQNAPPGAGMN**SLIVGLMVT****CNTMSFAYQTGAALN**  
**PSRDFGPRLALLALGYGSS**LFTNPYWFY**GPWAGSLAGSFLGAFLYDFMIFTGG**ESPVNYPWERTQRAMRKSRMKW  
GKRLHLSRRDRGEKTVR

>**AQPF**\_ATCC64974\_75350

MVVTYLPYYESDETHPQHHLGPAIPPFAGRMGGNQDFVVDRTDPKNSKVLERVDPDAAP**CM**TLKEIFDLRGFLSV  
DLWK**FAVLECIASMMNVFITCW**VTTTHPLSATTSPKGQAGVYGTVTFFSPTFGG**LTNLLLTPLLIYTFSPSSGGHI**  
SPTITLATFFARIITFPR**MILYLAGQTLGGALAGFAM**HSAYGTREFTVGG**CH**IDTTMVSAKD**LVIEFFACLILI**  
**FLAFGVALD**PRQAKVFGHAV**SPWLVG**VVLGIVTWGTA**FT**REGYIGASV**NP**AR**CF**GAYVASDFPTYHWIH**WVGPLA**  
**AAVAHGLVYFVDPLW**KDPRAE

>**AQPG**\_ATCC64974\_111300 (5 transmembrane domains)

MIPETEKSGCREKPAHGIAFPFQTHPDGYQKTVKTDTEMPVWK**CL**ASIDMWRC**TL**E**CL**ASMMYTFMLTWVTIAP  
TSKDRDDPGNLSYSSLNNDWVR**FLPTSIVNVCLLPLIIFT**FARSTGGYV**NPS**ITFAAYFLRRISLSR**AVMYIGG**  
**QVIGIVLAVWAVQ**EAYGSTGFDIG**CI**ISRGGSIRNAY**IAEVVSGFAMVVTVMYIAA**GRKSGVLFGDAM**SPWMVG**  
**IATEAAFWLSRLI**WQGHGPASRQLI

- AQPs amino acid sequences used in classification

| Accession number  | Species                   | Predicted class  |
|-------------------|---------------------------|------------------|
| SPB42568.1 (AQPA) | <i>A. niger</i> ATCC64974 | orthodox-AQP     |
| SPB44895.1 (AQPB) | <i>A. niger</i> ATCC64974 | Yfl054-like-AQGP |
| SPB44966.1 (AQPC) | <i>A. niger</i> ATCC64974 | XIP              |
| SPB47598.1 (AQPD) | <i>A. niger</i> ATCC64974 | $\gamma$ -AQGP   |
| SPB49549.1 (AQPE) | <i>A. niger</i> ATCC64974 | Yfl054-like-AQGP |
| SPB49917.1 (AQPF) | <i>A. niger</i> ATCC64974 | XIP              |
| SPB53530.1 (AQPG) | <i>A. niger</i> ATCC64974 | -                |
| CBF75100          | <i>A. nidulans</i>        | $\alpha$ -AQGP   |
| EAW06528          | <i>A. clavatus</i>        | $\alpha$ -AQGP   |
| EED48588          | <i>A. flavus</i>          | $\alpha$ -AQGP   |
| BAE57020          | <i>A. oryzae</i>          | $\alpha$ -AQGP   |
| EGU81740          | <i>F. oxysporum</i>       | $\alpha$ -AQGP   |
| JQ585594          | <i>L. bicolor</i>         | $\beta$ -AQGP    |
| EFQ30640          | <i>C. graminicola</i>     | $\beta$ -AQGP    |
| GAA93674          | <i>M. osmundae</i>        | $\beta$ -AQGP    |
| XP658434          | <i>A. nidulans</i>        | $\gamma$ -AQGP   |
| EED45967          | <i>A. flavus</i>          | $\gamma$ -AQGP   |
| XP001400456       | <i>A. niger</i> CBS513.88 | $\gamma$ -AQGP   |
| GAA84320          | <i>A. kawachii</i>        | $\gamma$ -AQGP   |
| CAA38096          | <i>S. cerevisiae</i>      | FPS1-like-AQGP   |
| XP453974          | <i>K. lactis</i>          | FPS1-like-AQGP   |
| XP445318          | <i>C. glabrata</i>        | FPS1-like-AQGP   |
| GAA2303           | <i>S. cerevisiae</i>      | Yfl054-like-AQGP |
| XP680887          | <i>A. nidulans</i>        | Yfl054-like-AQGP |
| EED52139          | <i>A. flavus</i>          | Yfl054-like-AQGP |
| XP001825721       | <i>A. oryzae</i>          | Yfl054-like-AQGP |
| CAK42703          | <i>A. niger</i> CBS513.88 | Yfl054-like-AQGP |
| XP001217233       | <i>A. terreus</i>         | Yfl054-like-AQGP |

---

|             |                           |                  |
|-------------|---------------------------|------------------|
| EGU87897    | <i>F. oxysporum</i>       | Yfl054-like-AQGP |
| GAA86900    | <i>A. kawachii</i>        | Yfl054-like-AQGP |
| EAW09088    | <i>A. clavatus</i>        | Yfl054-like-AQGP |
| EJP62256    | <i>B. bassiana</i>        | $\delta$ -AQGP   |
| ELQ43205    | <i>M. oryzae</i>          | $\delta$ -AQGP   |
| AFJ15556    | <i>L. bicolor</i>         | $\delta$ -AQGP   |
| AGE95845    | <i>E. cuniculi</i>        | SIP-like         |
| EEQ81370    | <i>N. ceranae</i>         | SIP-like         |
| EIJ87245    | <i>N. parisii</i>         | SIP-like         |
| XP001547129 | <i>B. cinerea</i>         | orthodox-AQP     |
| ADC55259    | <i>S. cerevisiae</i>      | orthodox-AQP     |
| EGU79346    | <i>F. oxysporum</i>       | orthodox-AQP     |
| EAW13465    | <i>A. clavatus</i>        | orthodox-AQP     |
| CBF7893     | <i>A. nidulans</i>        | orthodox-AQP     |
| EED52312    | <i>A. flavus</i>          | orthodox-AQP     |
| XP001211324 | <i>A. terreus</i>         | orthodox-AQP     |
| EED52460    | <i>A. flavus</i>          | orthodox-AQP     |
| XP001825978 | <i>A. oryzae</i>          | orthodox-AQP     |
| XP001390456 | <i>A. niger</i> CBS513.88 | XIP              |
| EED45369    | <i>A. flavus</i>          | XIP              |
| XP00139648  | <i>A. niger</i> CBS513.88 | XIP              |
| EGX52763    | <i>A. oligospora</i>      | XIP              |
| EGU75229    | <i>F. oxysporum</i>       | XIP              |

---
