# Supplementary material for: Identification of Aspergillus niger Aquaporins Involved in Hydrogen Peroxide Signaling
Source: MDPI journal article supplement (doi:10.3390/jof9040499), 2023-04-21
Supplement: s1 [file s1]

## Identification of *Aspergillus niger* aquaporins involved in hydrogen peroxide signaling

Thanaporn Laothanachareon <sup>1,2,\*</sup>, Enrique Asin-Garcia <sup>1,3</sup>, Rita J.M. Volkers <sup>1</sup>, Juan Antonio Tamayo-Ramos <sup>4</sup>, Vitor A.P. Martins dos Santos <sup>3</sup> and Peter J. Schaap <sup>1,5,\*</sup>

<sup>1</sup> Laboratory of Systems and Synthetic Biology, Wageningen University & Research, 6708 WE Wageningen, The Netherlands; enrique.asingarcia@wur.nl (E.A.-G.); j.m.volkers@nvwa.nl (R.J.V.)

<sup>2</sup> Enzyme Technology Laboratory, Biorefinery and Bioproduct Technology Research Group, National Center for Genetic Engineering and Biotechnology, 113 Thailand Science Park, Khlong Luang, Pathumthani 12120, Thailand

<sup>3</sup> Biomanufacturing and Digital Twins, Wageningen University and Research, 6708 PB Wageningen, The Netherlands; vitor.martinsdossantos@wur.nl

<sup>4</sup> ITENE Research Center, Industrial Biotechnology Area, C/Albert Einstein 1, Paterna, 46980 Valencia, Spain; ja.tamayoramos@gmail.com

<sup>5</sup> UNLOCK Large Scale Infrastructure for Microbial Communities, Wageningen University and & Research and Delft University of Technology, 6708 WE Wageningen, The Netherlands

\* Correspondence: thanaporn.lao@biotec.or.th (T.L.); peter.schaap@wur.nl (P.J.S.)

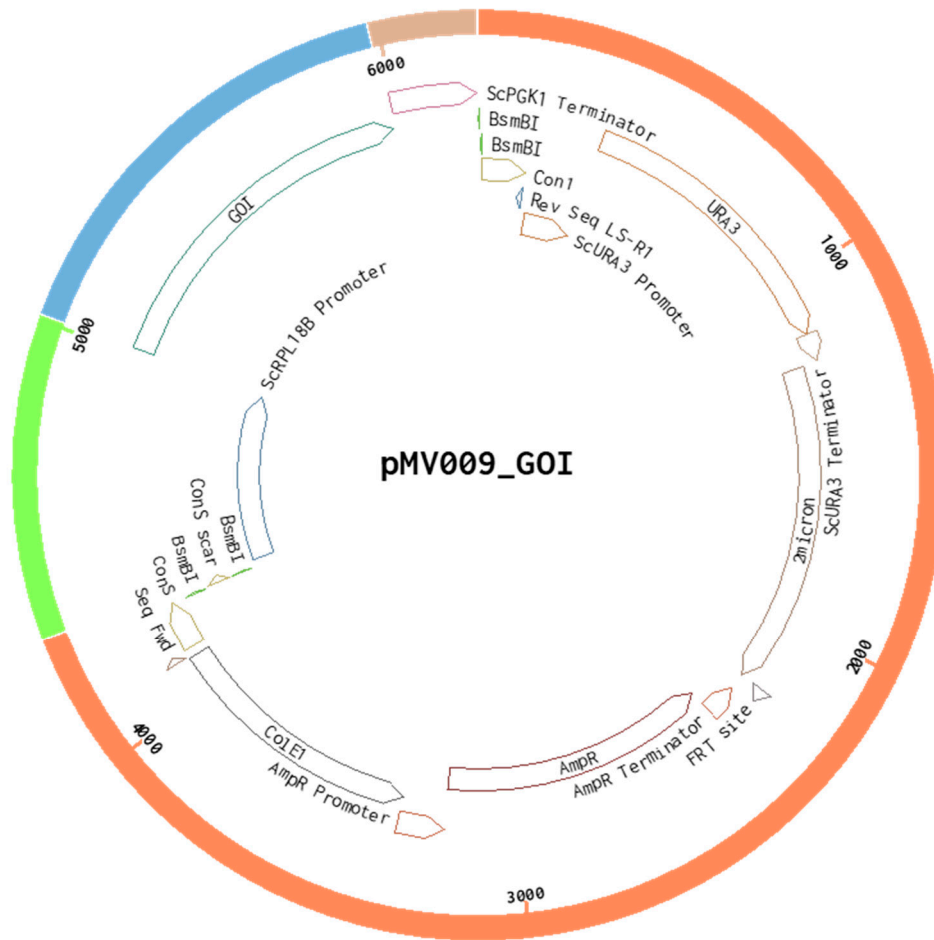

**Figure S1: Plasmid containing *A. niger* AQPs.** Each *A. niger* AQP was inserted in between pRPL18B and tPGK1 terminator and then cloned into high copy number plasmid pMV009. The plasmid contains *AmpR* gene as an ampicillin resistance gene and *URA3* gene as a marker gene. Once the AQPs were ligated into the plasmid, GFP sequence was removed.
